# Supplementary material for: Constructing heterophase structures of α-Cu2V2O7/β-Cu2V2O7 to enhance photovoltaic and photocatalytic properties
Source: Royal Society of Chemistry journal article supplement (doi:10.1039/d5cp00244c), 2025-01-01

## Supporting Information

**Table S1**  $\alpha/\beta$  phase ratio depending on the XRD patterns in Fig. 1a,b.

|                            | $x = 0$ | $x = 0.005$ | $x = 0.01$ | $x = 0.02$ | $x = 0.03$ | $x = 0.05$ | $x = 0.07$ | $x = 0.09$ |
|----------------------------|---------|-------------|------------|------------|------------|------------|------------|------------|
| $\alpha/\beta$ phase ratio | 1:0     | 1.7:1       | 1.8:1      | 1.8:1      | 1.2:1      | 0.9:1      | 0.4:1      | 0.6:1      |

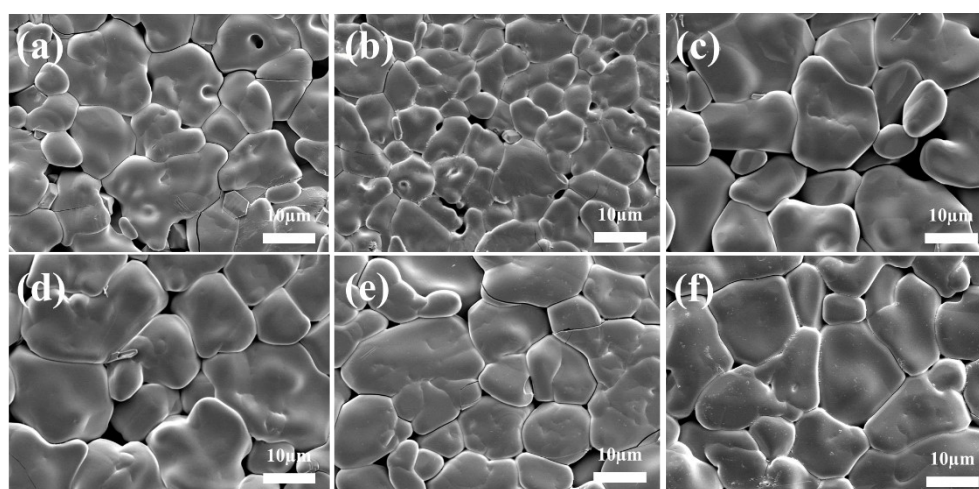

**Fig. S1.** SEM images of  $\alpha$ - $\text{Cu}_{2-x}\text{Li}_x\text{V}_2\text{O}_7$  with  $x = 0$  (a), 0.01 (b), 0.03 (c), 0.05 (d), 0.07 (e), 0.09 (f).

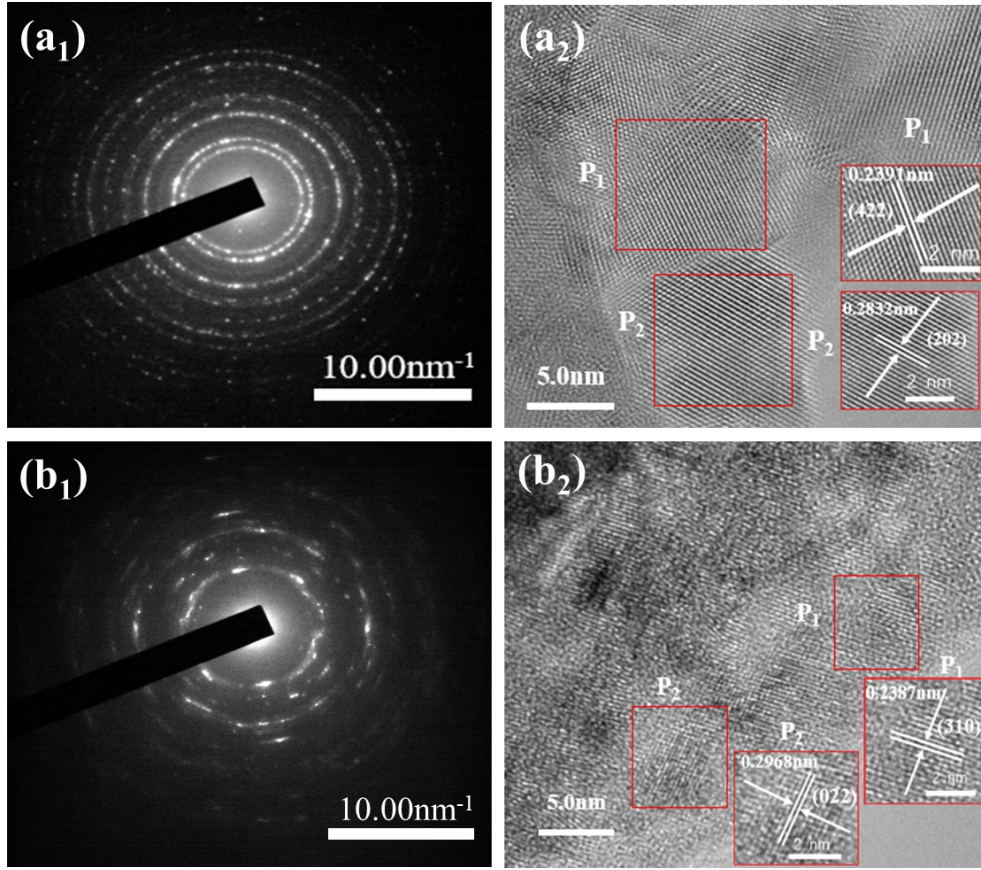

**Fig. S2.** SAED patterns: electron diffraction spots and lattice fringes of  $\alpha$ - $\text{Cu}_{2-x}\text{Li}_x\text{V}_2\text{O}_7$  with  $x = 0$  ( $a_1, a_2$ ), 0.07 ( $b_1, b_2$ ).

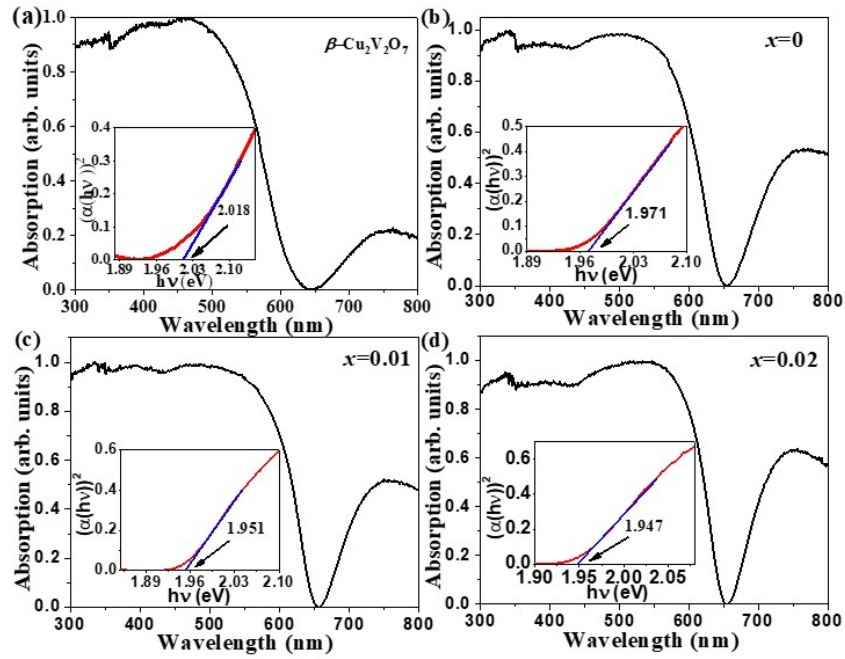

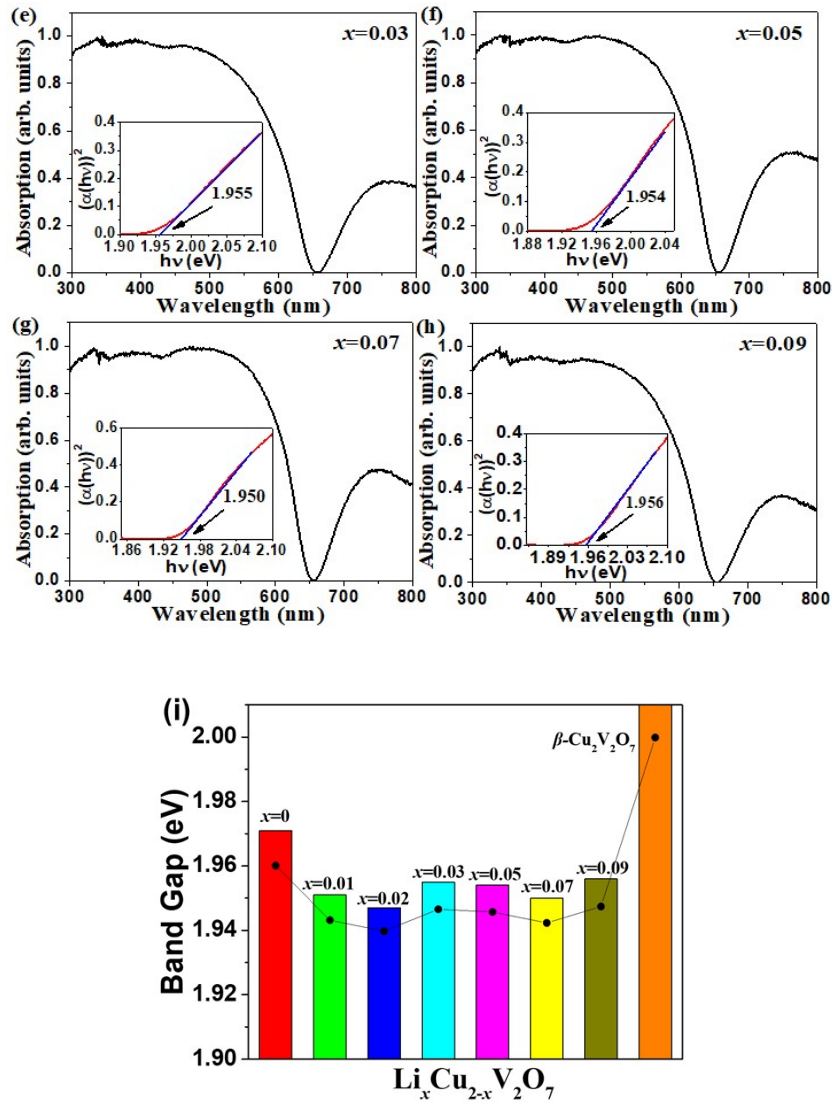

**Fig. S3.** (a-h) UV-absorption spectra of  $\beta$ - $\text{Cu}_2\text{V}_2\text{O}_7$  and Li-doped  $\alpha$ - $\text{Cu}_2\text{V}_2\text{O}_7$ . The inset exhibits that estimated band gaps ( $E_g$ ) through absorption spectra. (i) Band gap change with Li content.

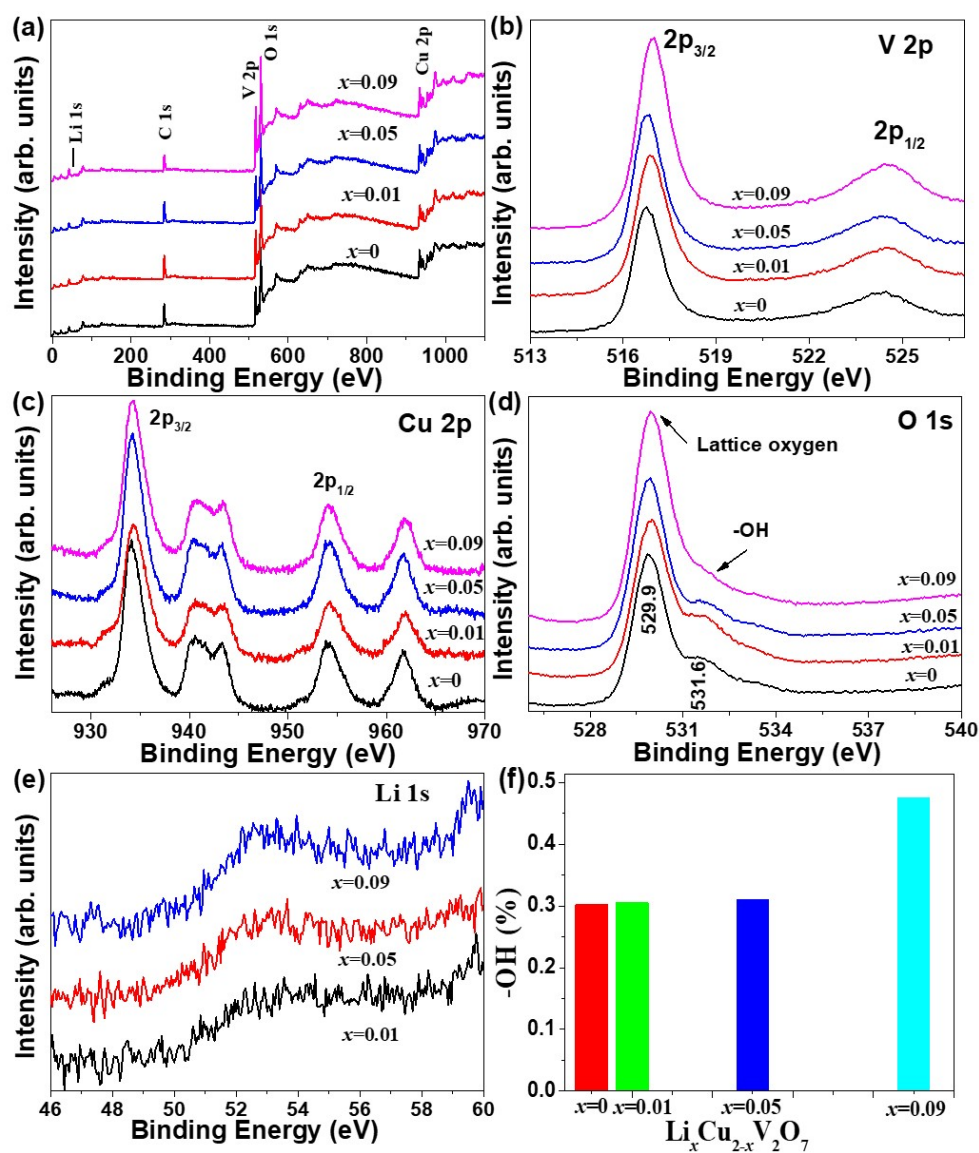

**Fig. S4.** XPS survey spectra, core level spectra, and adsorptive -OH concentration of

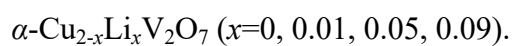

Supplement: d5cp00244c1.pdf [file d5cp00244c1.pdf]
